# Supplementary material
Source: publisher figshare collection journal article supplement (https://asha.figshare.com/articles/dataset/_/26376502)
Supplement: Supplementary file 1 [file 1]

**Supplemental Material S2.** Latencies and amplitudes of speech-ABR measures for children with ADHD and TD children.

|                        | Children with<br>ADHD ( <i>n</i> = 73) | <i>n</i> (%) | TD children<br>( <i>n</i> = 82) | <i>n</i> (%) | Cohen's <i>d</i> (95% CI) | <i>t</i> <sup>#</sup> | <i>p</i> <sup>#</sup> |
|------------------------|----------------------------------------|--------------|---------------------------------|--------------|---------------------------|-----------------------|-----------------------|
|                        | Mean ± <i>SD</i>                       |              | Mean ± <i>SD</i>                |              |                           |                       |                       |
| <b>Latencies (ms)</b>  |                                        |              |                                 |              |                           |                       |                       |
| V                      | 6.74 ± 0.29                            | 73 (100)     | 6.61 ± 0.28                     | 82 (100)     | 0.447 (0.127~0.766)       | 2.779                 | .006**                |
| A                      | 7.75 ± 0.37                            | 73 (100)     | 7.54 ± 0.31                     | 82 (100)     | 0.614 (0.290~0.936)       | 3.807                 | < .001***             |
| C                      | 18.39 ± 0.87                           | 60 (82.2)    | 18.49 ± 0.80                    | 67 (81.7)    | -0.121 (-0.469~0.228)     | -0.765                | .446                  |
| D                      | 22.65 ± 0.73                           | 65 (89.0)    | 22.39 ± 0.52                    | 73 (89.0)    | 0.408 (0.070~0.745)       | 2.047                 | .043*                 |
| E                      | 31.18 ± 0.77                           | 72 (98.6)    | 31.02 ± 0.70                    | 81 (98.8)    | 0.216 (-0.103~0.534)      | 0.648                 | .518                  |
| F                      | 39.48 ± 0.69                           | 70 (95.9)    | 39.57 ± 0.78                    | 80 (97.6)    | -0.128 (-0.449~0.193)     | -1.023                | .308                  |
| O                      | 48.01 ± 0.67                           | 71 (97.2)    | 47.91 ± 0.96                    | 81 (98.8)    | 0.128 (-0.191~0.447)      | 0.180                 | .857                  |
| <b>Amplitudes (μV)</b> |                                        |              |                                 |              |                           |                       |                       |
| V                      | 0.12 ± 0.07                            |              | 0.11 ± 0.07                     |              | 0.112 (-0.204~0.428)      | 0.328                 | .743                  |
| A                      | -0.22 ± 0.07                           |              | -0.22 ± 0.07                    |              | 0.086 (-0.230~0.402)      | 0.320                 | .749                  |
| C                      | -0.16 ± 0.17                           |              | -0.12 ± 0.11                    |              | -0.284 (-0.634~0.067)     | -1.941                | .055                  |
| D                      | -0.20 ± 0.10                           |              | -0.22 ± 0.09                    |              | 0.203 (-0.133~0.538)      | 1.367                 | .174                  |
| E                      | -0.26 ± 0.15                           |              | -0.25 ± 0.10                    |              | -0.123 (-0.440~0.195)     | -0.594                | .554                  |
| F                      | -0.24 ± 0.15                           |              | -0.23 ± 0.09                    |              | -0.090 (-0.411~0.231)     | -0.681                | .497                  |
| O                      | -0.23 ± 0.18                           |              | -0.18 ± 0.10                    |              | -0.339 (-0.659~-0.018)    | -2.083                | .039*                 |

*Notes.* Children with neonatal jaundice in the neonatal period were excluded. Linear mixed-effects model was used to determine the differences in speech-ABR amplitude and latency between ADHD and TD groups. Fixed effects included in the model were gender, age, gestational weeks, paternal educational level, maternal educational level, annual household income, and speech-ABR Waves × Group interaction; the subject was included as a random effect. # denotes the Waves × Group interaction; \**p* < .05; \*\**p* < .01; \*\*\**p* < .001. Speech-ABR = speech auditory brainstem response; ADHD = attention-deficit/hyperactivity disorder; TD = typically developing.
