# Supplementary material
Source: publisher figshare collection journal article supplement (https://asha.figshare.com/articles/dataset/_/26376502)
Supplement: Supplementary file 2 [file 1]

**Supplemental Material S5.** Analysis on factors influencing the wave D of speech-ABR by multiple linear regression analysis.

| Variable                         | Assignment of variables                                                                          | Unstandardized coefficients |           | Standardized coefficients | <i>t</i> | <i>p</i> |
|----------------------------------|--------------------------------------------------------------------------------------------------|-----------------------------|-----------|---------------------------|----------|----------|
|                                  |                                                                                                  | $\beta$                     | <i>SE</i> | $\beta$                   |          |          |
| Group                            | ADHD = 1; TD = 2                                                                                 | -0.282                      | 0.121     | -0.217                    | -2.334   | .021*    |
| Age (months)                     | Numerical value                                                                                  | -0.006                      | 0.006     | -0.088                    | -1.073   | .285     |
| Gender                           | Male = 1; Female = 2                                                                             | -0.06                       | 0.13      | -0.038                    | -0.463   | .644     |
| Gestational weeks                | < 37 weeks = 1; $\geq$ 37 weeks = 2                                                              | 0.049                       | 0.139     | 0.03                      | 0.356    | .722     |
| Neonatal jaundice                | No = 1; Yes = 2                                                                                  | 0.088                       | 0.2       | 0.036                     | 0.437    | .663     |
| Paternal educational level       | Junior high school and below = 1; High school = 2; College = 3; Bachelor's = 4; Postgraduate = 5 | 0.086                       | 0.073     | 0.127                     | 1.169    | .245     |
| Maternal educational level       | Same as above                                                                                    | -0.023                      | 0.075     | -0.034                    | -0.301   | .764     |
| Annual household income (RMB)    | < 100,000 = 1; 100,000~200,000 = 2; 200,000~300,000 = 3; > 300,000 = 4                           | -0.183                      | 0.073     | -0.252                    | -2.505   | .013*    |
| Full-scale intelligence quotient | Numerical value                                                                                  | 0.006                       | 0.005     | 0.111                     | 1.22     | .225     |

*Note.* The dependent variable is the latency of wave D. *SE* = standard error; \**p* < .05; speech-ABR = speech auditory brainstem response; ADHD = attention-deficit/hyperactivity disorder; TD = typically developing.
