# Supplementary material
Source: publisher figshare collection journal article supplement (https://asha.figshare.com/articles/dataset/_/26376502)
Supplement: Supplementary file 3 [file 1]

**Supplemental Material S4.** Analysis on factors influencing the wave A of speech-ABR by multiple linear regression analysis.

| Variable                         | Assignment of variables                                                                          | Unstandardized coefficients |           | Standardized coefficients | <i>t</i> | <i>p</i>  |
|----------------------------------|--------------------------------------------------------------------------------------------------|-----------------------------|-----------|---------------------------|----------|-----------|
|                                  |                                                                                                  | $\beta$                     | <i>SE</i> | $\beta$                   |          |           |
| Group                            | ADHD = 1; TD = 2                                                                                 | -0.267                      | 0.063     | -0.362                    | -4.262   | < .001*** |
| Age (months)                     | Numerical value                                                                                  | -0.004                      | 0.003     | -0.113                    | -1.530   | .128      |
| Gender                           | Male = 1; Female = 2                                                                             | -0.135                      | 0.067     | -0.152                    | -2.030   | .044*     |
| Gestational weeks                | < 37 weeks = 1;<br>≥ 37 weeks = 2                                                                | 0.155                       | 0.07      | 0.165                     | 2.203    | .029*     |
| Neonatal jaundice                | No = 1; Yes = 2                                                                                  | 0.096                       | 0.103     | 0.069                     | 0.929    | .354      |
| Paternal educational level       | Junior high school and below = 1; High school = 2; College = 3; Bachelor's = 4; Postgraduate = 5 | 0.034                       | 0.038     | 0.090                     | 0.912    | .363      |
| Maternal educational level       | Same as above                                                                                    | -0.017                      | 0.038     | -0.045                    | -0.438   | .662      |
| Annual household income (RMB)    | < 100,000 = 1;<br>100,000~200,000 = 2;<br>200,000~300,000 = 3;<br>> 300,000 = 4                  | 0.01                        | 0.038     | 0.024                     | 0.264    | .792      |
| Full-scale intelligence quotient | Numerical value                                                                                  | 0.003                       | 0.002     | 0.130                     | 1.556    | .122      |

*Note.* The dependent variable is the latency of wave A. *SE* = standard error; \**p* < .05; \*\*\**p* < .001; speech-ABR = speech auditory brainstem response; ADHD = attention-deficit/hyperactivity disorder; TD = typically developing.
