# Supplementary material
Source: publisher figshare collection journal article supplement (https://asha.figshare.com/articles/dataset/_/26376502)
Supplement: Supplementary file 4 [file 1]

**Supplemental Material S3.** Analysis on factors influencing the wave V of speech-ABR by multiple linear regression analysis.

| Variable                         | Assignment of variables                                                                          | Unstandardized coefficients |           | Standardized coefficients | <i>t</i> | <i>p</i> |
|----------------------------------|--------------------------------------------------------------------------------------------------|-----------------------------|-----------|---------------------------|----------|----------|
|                                  |                                                                                                  | $\beta$                     | <i>SE</i> | $\beta$                   |          |          |
| Group                            | ADHD = 1; TD = 2                                                                                 | -0.142                      | 0.051     | -0.245                    | -2.806   | .006**   |
| Age (months)                     | Numerical value                                                                                  | -0.003                      | 0.002     | -0.114                    | -1.516   | .132     |
| Gender                           | Male = 1; Female = 2                                                                             | -0.16                       | 0.054     | -0.228                    | -2.968   | .003**   |
| Gestational weeks                | < 37 weeks = 1;<br>≥ 37 weeks = 2                                                                | 0.072                       | 0.057     | 0.098                     | 1.271    | .206     |
| Neonatal jaundice                | No = 1; Yes = 2                                                                                  | 0.073                       | 0.083     | 0.067                     | 0.875    | .383     |
| Paternal educational level       | Junior high school and below = 1; High school = 2; College = 3; Bachelor's = 4; Postgraduate = 5 | 0.006                       | 0.031     | 0.020                     | 0.195    | .845     |
| Maternal educational level       | Same as above                                                                                    | 0.011                       | 0.031     | 0.038                     | 0.356    | .722     |
| Annual household income (RMB)    | < 100,000 = 1;<br>100,000~200,000 = 2;<br>200,000~300,000 = 3;<br>> 300,000 = 4                  | 0.011                       | 0.031     | 0.033                     | 0.348    | .728     |
| Full-scale intelligence quotient | Numerical value                                                                                  | 0.001                       | 0.002     | 0.066                     | 0.771    | .442     |

*Notes.* The dependent variable is the latency of wave V. *SE* = standard error; \*\**p* < .01; speech-ABR = speech auditory brainstem response; ADHD = attention-deficit/hyperactivity disorder; TD = typically developing.
