# Supplementary material
Source: publisher figshare collection journal article supplement (https://asha.figshare.com/articles/dataset/_/26376502)
Supplement: Supplementary file 5 [file 1]

**Supplemental Material S1.** Pure-tone air-conduction threshold for all children.

| PTA (dB HL)               | Children with ADHD<br>( <i>n</i> = 84) | TD children<br>( <i>n</i> = 84) | <i>Z</i> | <i>p</i> |
|---------------------------|----------------------------------------|---------------------------------|----------|----------|
|                           | Median (Q1, Q3)                        | Median (Q1, Q3)                 |          |          |
| Right                     |                                        |                                 |          |          |
| 500 Hz                    | 5.0 (0.0, 10.0)                        | 5.0 (0.0, 10.0)                 | -0.167   | .867     |
| 1000 Hz                   | 5.0 (0.0, 5.0)                         | 5.0 (0.0, 5.0)                  | -0.861   | .389     |
| 2000 Hz                   | 5.0 (0.0, 5.0)                         | 5.0 (0.0, 5.0)                  | -0.774   | .439     |
| 4000 Hz                   | 5.0 (0.0, 10.0)                        | 2.5 (0.0, 10.0)                 | -1.394   | .163     |
| 8000 Hz                   | 0.0 (0.0, 5.0)                         | 0.0 (0.0, 5.0)                  | -0.513   | .608     |
| Average hearing threshold | 3.8 (1.3, 7.5)                         | 3.8 (0.0, 7.5)                  | -1.110   | .267     |
| Left                      |                                        |                                 |          |          |
| 500 Hz                    | 1.0 (5.0,10.0)                         | 7.5 (0.0, 10.0)                 | -0.418   | .676     |
| 1000 Hz                   | 5.0 (0.0, 10.0)                        | 5.0 (0.0, 10.0)                 | -0.595   | .552     |
| 2000 Hz                   | 5.0 (0.0, 10.0)                        | 5.0 (0.0, 10.0)                 | -0.640   | .522     |
| 4000 Hz                   | 5.0 (0.0, 8.8)                         | 5.0 (0.0, 5.0)                  | -1.048   | .294     |
| 8000 Hz                   | 5.0 (0.0, 5.0)                         | 5.0 (0.0, 5.0)                  | -0.071   | .944     |
| Average hearing threshold | 5.0 (1.6, 9.7)                         | 5.0 (1.3, 8.8)                  | -0.745   | .456     |

*Note.* ADHD = attention-deficit/hyperactivity disorder; TD = typically developing; PTA = pure-tone audiometry; *Z* = Wilcoxon signed-ranks test, the data did not conform to the normal distribution, so the nonparametric test was used for statistical analysis.
